# Supplementary material for: Simple hydrothermal synthesis of defective CeMoSe2 dendrites as an effective electrocatalyst for the electrochemical sensing of 4-nitrophenol in water samples
Source: Royal Society of Chemistry journal article supplement (doi:10.1039/c9nj03891d), 2019-01-01
Supplement: c9nj03891d1.pdf [file c9nj03891d1.pdf]

### Supplementary Data

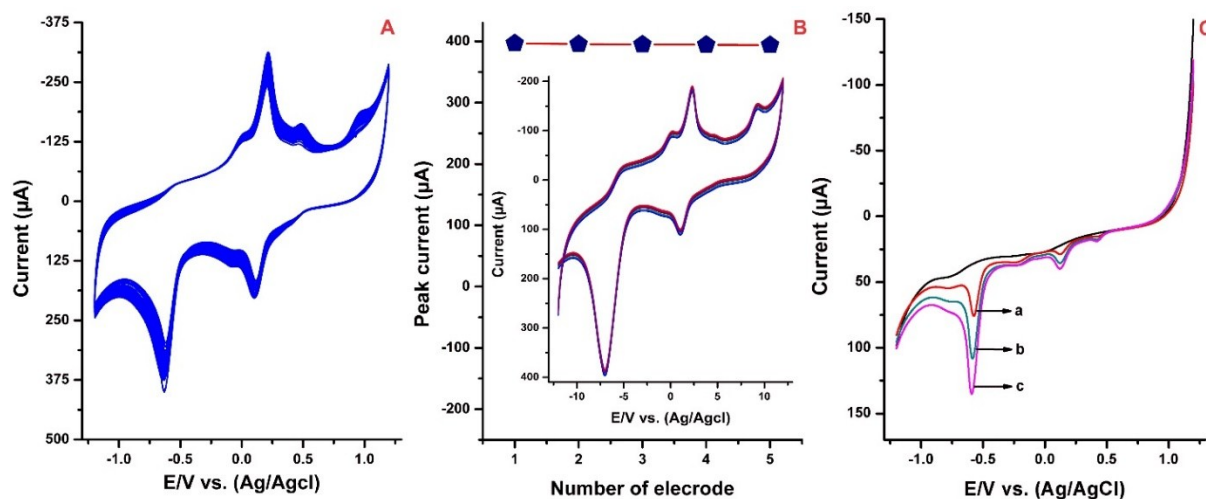

**Fig S1.** (A) Cyclic stability test (B) Reproducibility studies with linear plot (Inset) and (C) Real sample analysis (a) 9  $\mu\text{M}$  (b) 15  $\mu\text{M}$ , and (c) 22  $\mu\text{M}$ .
